# Supplementary material for: Precursor-induced fabrication of β-Bi2O3 microspheres and their performance as visible-light-driven photocatalysts
Source: Royal Society of Chemistry journal article supplement (doi:10.1039/c3ta11652b), 2013-01-01
Supplement: c3ta11652b.pdf [file c3ta11652b.pdf]

## Electronic Supplementary Material

### Precursor-Induced Fabrication of $\beta$ - $\text{Bi}_2\text{O}_3$ Microspheres and their Performance as Visible-Light-Driven Photocatalysts

Jiali Wang<sup>1</sup>, Xiaodan Yang<sup>1</sup>, Kun Zhao<sup>1</sup>, Pengfei Xu<sup>1</sup>, Lingbo Zong<sup>1</sup>, Ranbo Yu<sup>1,\*</sup>,  
Dan Wang<sup>2,\*</sup>, Jinxia Deng<sup>1</sup>, Jun Chen<sup>1</sup> and Xianran Xing<sup>1</sup>

<sup>1</sup>Department of Physical Chemistry, University of Science and Technology Beijing,  
Beijing 100083, PR China

<sup>2</sup>Institute of Process Engineering, Chinese Academy of Sciences, Beijing, 100190, PR  
China

Tel.: +86-10-62332525

Fax: +86-10-62332525

\* E-mail: <sup>1</sup> [ranboyu@ustb.edu.cn](mailto:ranboyu@ustb.edu.cn); <sup>2</sup> [danwang@mail.ipe.ac.cn](mailto:danwang@mail.ipe.ac.cn)

### Supplementary Figures

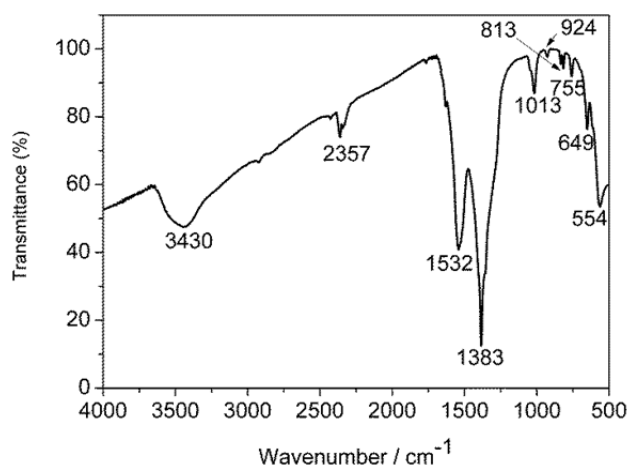

**Fig. S1.** IR Spectra of the precursor

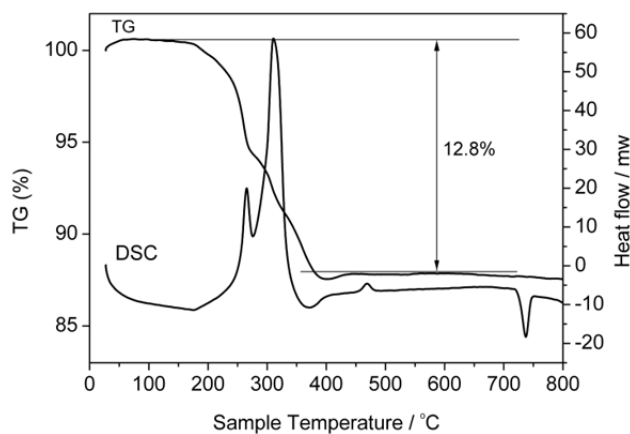

**Fig. S2.** TG-DSC curves of precursor

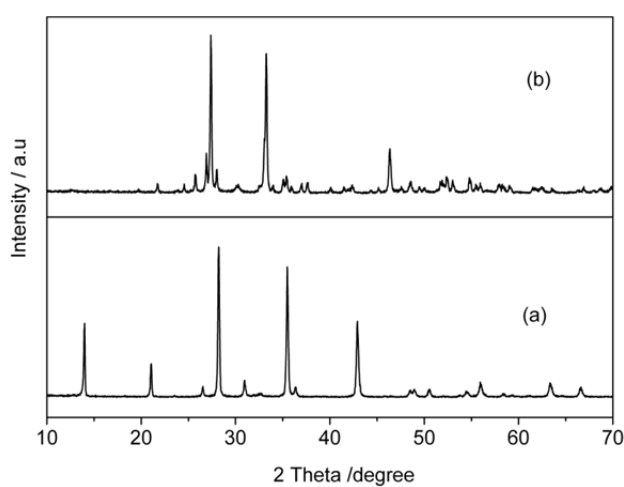

**Fig. S3.** XRD pattern of the (a) precursor obtained at longer reaction time 3 h, (b)  $\alpha$ - $\text{Bi}_2\text{O}_3$  (350 °C for 4 h at heating rate of 2 °C  $\text{min}^{-1}$ )

**Table S1. Brunauer–Emmett–Teller (BET) specific surface areas for different samples.**

| Samples                    | precursor | $\beta$ - $\text{Bi}_2\text{O}_3$ | $\alpha$ - $\text{Bi}_2\text{O}_3$ | Commercial $\text{Bi}_2\text{O}_3$ |
|----------------------------|-----------|-----------------------------------|------------------------------------|------------------------------------|
| BET surface                | 25.8      | 10.6                              | 4.8                                | 0.4                                |
| $/\text{m}^2\text{g}^{-1}$ |           |                                   |                                    |                                    |

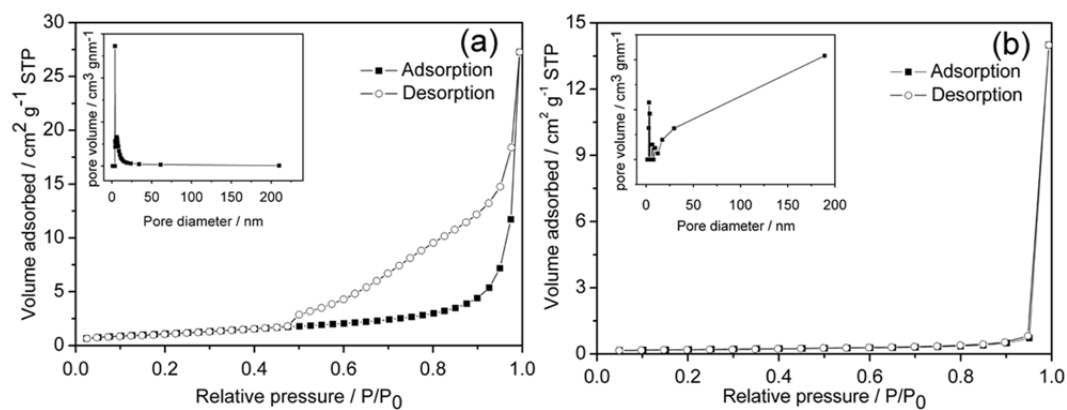

**Fig. S4.**  $\text{N}_2$  gas adsorption-desorption isotherms of the as prepared samples: (a) precursor, (b)  $\beta\text{-Bi}_2\text{O}_3$ ; Insert: the corresponding pore-size distribution.

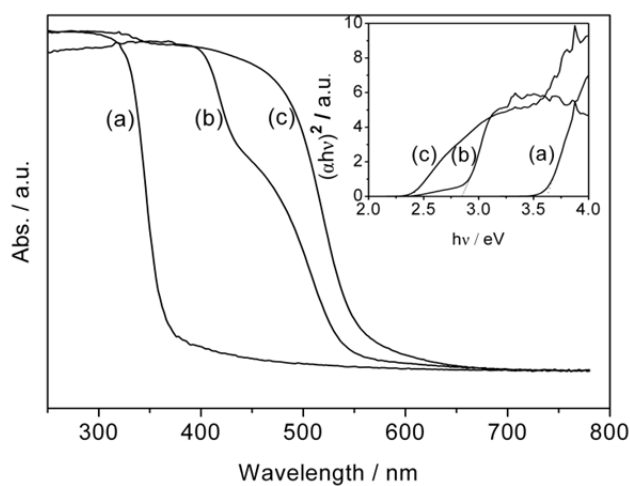

**Fig. S5.** UV-vis diffuse reflectance spectra of the as prepared samples: (a) precursor, (b)  $\alpha\text{-Bi}_2\text{O}_3$ , and (c)  $\beta\text{-Bi}_2\text{O}_3$ ; Insert: the corresponding plots of  $(\alpha h\nu)^2$  versus energy ( $h\nu$ ).
